# Supplementary material for: The impacts of secondary ice production on the microphysics and dynamics of mid-latitude cold season convection
Source: Copernicus journal article supplement (doi:10.5194/egusphere-2025-649), 2025-03-12
Supplement: Supplementary file [file egusphere-2025-649-AC1-supplement.pdf]

# **The impacts of secondary ice production on the microphysics and dynamics of mid-latitude cold season convection**

## **Reviewer #1**

### **General comments:**

The results of contrasting the importance of SIP for convective and stratiform conditions through comparison with *in situ* ICICLE observations are interesting. However, the manuscript can be significantly improved by considering the following points:

1. Description of cloud microphysics in model parameterizations be improved (see detailed comment below).
2. Primary ice nucleation and role of it for model simulations.
3. Role of other SIP mechanisms (e.g., ice-ice collisional breakup) for model simulations.

*Thank you very much for your valuable comments which helped to improve the manuscript! Please see the answers below for the specific points (responses in blue).*

### **Specific comments:**

Line 26: “influencing the energy balance and hydrological cycle on both regional and global scales”. Please provide some citations, e.g., Zhao and Liu GRL 2021, among others.

*Thank you for the suggestion. Multiple citations have been added into the revised version, including Field et al. 2017, Kanji et al. 2017, Korolev and Leisner, 2020, Zhao and Liu, 2021.*

*We also added this citation into the reference list:*

*Zhao, X. and Liu, X.: Global importance of secondary ice production. Geophys. Res. Lett., 48, e2021GL092581. <https://doi.org/10.1029/2021GL092581>, 2021.*

Line 92: “(PSD)”?

*The original text in the manuscript is:*

*“The DMT Precipitation Imaging Probe (PIP: Baumgardner et al., 2001) provided measurements of particles in the nominal size range from 100  $\mu\text{m}$  to 6.4 mm (PSD).”*

*We changed it to:*

*“The DMT Precipitation Imaging Probe (PIP: Baumgardner et al., 2001) provided measurements of particle sizes and their concentrations in the nominal size range from 100  $\mu\text{m}$  to 6.4 mm.”*

Line 99: “sizes of ice and liquid particles, ice and liquid water content (LWC) were calculated from PSDs measured by particle probes”. How do you separate liquid from ice particles to calculate LWC and IWC?

For the calculation of LWC and IWC, we used a complex set of rules involving scattering probes (e.g., FCCP, CDP, FCDP), optical array imaging probes (e.g., 2DS, HVPS, PIP), a Rosemount icing detector, and a high-resolution imaging probe (e.g., CPI). The description of the phase discrimination algorithm involves consideration of cloud conditions with different phase compositions and the presence of precipitation-sized liquid drops. This description is quite lengthy and may be too destructive for a reader. For the sake of conciseness, we referenced publications describing the cloud phase discrimination algorithm and the sensitivity of the different cloud microphysical probes to particles with different thermodynamic phases. To address the reviewer's comment, the following statement was added in the text:

"The sensitivity of cloud microphysical probes to cloud particle thermodynamic phase and cloud discrimination phase algorithm could be found in e.g., Korolev et al. (2017) and Rugg et al. (2022)."

Reference:

Korolev, A., G. McFarquhar, P. R. Field, C. Franklin, P. Lawson, Z. Wang, E. Williams, S. J. Abel, D. Axisa, S. Borrmann, J. Crosier, J. Fugal, M. Krämer, U. Lohmann, O. Schlenczek, M. Schnaiter, and M. Wendisch, 2017: Mixed-Phase Clouds: Progress and Challenges. *Meteorological Monographs*, 58, 5.1–5.50, <https://doi.org/10.1175/AMSMONOGRAPHSD-17-0001.1>

Rugg, A., A., B. C. Bernstein, J. A. Haggerty, A. Korolev, C. Nguyen, M. Wolde, I. Heckman, and St. DiVito, 2022: High Ice Water Content Conditions Associated with Wintertime Elevated Convection in the Midwest. *Journal of Applied Meteorology and Climatology*, 61, 559–575, DOI: <https://doi.org/10.1175/JAMC-D-21-0189.1>

Line 102: “asses”? should be “assess”.

*Thank you! We corrected this typo.*

Figure 1: “The red rectangle”. Shall it be “orange rectangle”?

*Because ‘red’ is used consistently for rectangles or lines of the given color in different figures and no other color could cause confusion, we have decided to continue using ‘red’ instead of ‘orange’.*

Section 3.2. Description of cloud microphysics parameterizations should be improved.

*Thank you for the comments. Please find below the revised section 3.2. Added descriptions are underlined:*

“In the GEM simulations of this study, all grid-scale cloud microphysical processes were represented by the Predicted Particle Properties (P3) bulk microphysics parameterization scheme. The original version of the P3 scheme is described in detail in Morrison and Milbrandt (2015). Since its inception, there have been several advances which have been described in various publications.

*The liquid-phase component of P3 uses a standard two-category, two-moment approach whereby all liquid-phase hydrometeors are partitioned into “cloud” (non-sedimenting droplets) and “rain”, each of whose PSDs are represented by complete gamma functions and each has the mass and number mixing ratios as prognostic (and advected) variables. Droplet activation is parameterized following the approach of Morrison and Grabowski (2007, 2008), which assumes a constant background aerosol concentration of  $300 \text{ cm}^{-3}$  with a mean particle size of 0.05 micrometers ( $\mu\text{m}$ ), composed of ammonium sulfate. Work is currently underway to include prognostic aerosols.*

*P3 has a unique approach to represent ice-phase hydrometeors. In the traditional approach, as used in nearly all bulk and bin microphysics schemes, particles are partitioned into predefined categories (e.g. “ice”, “snow”, “graupel”, etc.) with prescribed physical properties (e.g. density, fall speed parameters, etc.). In contrast, P3 has a user-specified number of freely evolving generic ice-phase categories, each of whose physical properties evolve continuously in time and space. Because of this, each ice category in P3 can represent any type of ice-phase hydrometeor (with the limitations of a bulk scheme). Also, there is no artificial “conversion” between ice-phase categories, which is an inherent weakness in traditional schemes. Similar to the liquid categories, the PSD of each ice category in P3 is represented by a complete gamma function but has an optional triple-moment approach (Milbrandt et al. 2021). The generalization to the multi-category version of P3 is described in Milbrandt and Morrison (2016). The incorporation of an optional prognostic liquid fraction, which allows for mixed-phase particles and improves the simulation of processes such as melting and refreezing, is described in Cholette et al. (2019, 2024).*

*All simulations in this study use the configuration with triple-moment ice, prognostic liquid fraction, and four ice-phase categories. The decision to use four ice categories was made to maximize the representation of the multi-modal ice particle size distribution during conditions of high SIP rate where large pre-existing ice particles coexist with small ice splinters. Ice splinters generated by various SIP processes are assumed to have a diameter of  $10 \mu\text{m}$ . These small ice particles are incorporated into one of the four ice categories corresponding to the closest particle size. Qu et al. (2022) showed that three ice categories in the P3 scheme are sufficient to effectively capture the size distribution when SIP is active; Milbrandt et al. (2025) showed a similar “convergence” with three categories for the simulation of hail. Nevertheless, four categories were used in this study since the additional category should, in principle, model the total ice phase slightly better without significantly increasing computational cost.*

*In the “official” P3 scheme, ice is initiated via homogeneous freezing of cloud droplets, immersion/contact freezing of cloud droplets and rain drops (see Morrison and Milbrandt, 2015), heterogeneous nucleation via condensation freezing and deposition (Cooper, 1986), and rime splintering (Hallet and Mossop, 1974). Deposition nucleation is specifically restricted to temperatures at or below 258.15 K and requires ice supersaturation of at least 5%.”*

*Added reference:*

Cooper, W. A.: Ice initiation in natural clouds. *Precipitation Enhancement—A Scientific Challenge*, Meteor. Monogr., No. 43, Amer. Meteor. Soc., 29–32, <https://doi.org/10.1175/0065-9401-21.43.29>, 1986.

Milbrandt, J. A., Morrison, H., and Cholette, M.: Impacts of predicted liquid fraction and multiple ice-phase categories on the simulation of hail in the Predicted Particle Properties (P3) microphysics scheme. *Journal of Advances in Modeling Earth Systems*, 17, e2024MS004404. <https://doi.org/10.1029/2024MS004404>, 2025.

Morrison, H. and Grabowski, W. W.: Comparison of bulk and bin warm rain microphysics models using a kinematic framework. *J. Atmos. Sci.*, 64, 2839–2861, doi:10.1175/JAS3980, 2007

Morrison, H. and Grabowski, W. W.: Modeling supersaturation and subgrid-scale mixing with two-moment warm bulk microphysics. *J. Atmos. Sci.*, 65, 792–812, doi:10.1175/2007JAS2374.1, 2008.

How is ice nucleation parameterization represented in the model? how about aerosols and CCN treated in the model?

*Thanks for this question! We added additional clarifications in section 3.2. Here are the related descriptions:*

*“Droplet activation is parameterized following the approach of Morrison and Grabowski (2007, 2008), which assumes a constant background aerosol concentration of  $300\text{ cm}^{-3}$  with a mean particle size of 0.05 micrometers ( $\mu\text{m}$ ), composed of ammonium sulfate. Work is currently underway to include prognostic aerosols.”*

*“In the “official” P3 scheme, ice is initiated via homogeneous freezing of cloud droplets, immersion/contact freezing of cloud droplets and rain drops (see Morrison and Milbrandt, 2015), heterogeneous nucleation via condensation freezing and deposition (Cooper, 1986), and rime splintering (Hallet and Mossop, 1974). Deposition nucleation is specifically restricted to temperatures at or below 258.15 K and requires ice supersaturation of at least 5%.”*

Line 130: “four ice categories”. What are these four ice categories?

*Thanks for this comment! We added the following description to for the ice categories:*

*“P3 has a user-specified number of freely evolving generic ice-phase categories, each of whose physical properties evolve continuously in time and space. Because of this, each ice category in P3 can represent any type of ice-phase hydrometeor (with the limitations of a bulk scheme). Also, there is no artificial “conversion” between ice-phase categories, which is an inherent weakness in traditional schemes.”*

Line 131: “PSD”. No need to redefine it as it is defined above.

*Corrected.*

Line 133: “liquid ice mass”?

*Sorry about the confusion. The revised version does not mention this term anymore.*

Line 156: “Liquid “cloud droplets” are defined as having a diameter smaller than 50  $\mu\text{m}$ , while “rain drops” have a diameter exceeding this threshold”. How does P3 treat liquid-phase hydrometeors in P3?

*The description of liquid phase component is added into the updated section of P3:*

*“The liquid-phase component of P3 uses a standard two-category, two-moment approach whereby all liquid-phase hydrometeors are partitioned into “cloud” (non-sedimenting droplets) and “rain”, each of whose PSDs are represented by complete gamma functions and each has the mass and number mixing ratios as prognostic (and advected) variables. Droplet activation is parameterized following the approach of Morrison and Grabowski (2007, 2008), which assumes a constant background aerosol concentration of  $300\text{ cm}^{-3}$  with a mean particle size of 0.05 micrometers ( $\mu\text{m}$ ), composed of ammonium sulfate. Work is currently underway to include prognostic aerosols.”*

Equation (3): What are the units of these variables?

*We updated the description of the equation as:*

*“where  $N_i$  is the statistical average number of ice fragments per drop (#/freezing drop), and  $D$  is the freezing liquid drop diameter in  $\mu\text{m}$ .”*

Line 180. Considering the large uncertainty of the FFD parameterization, can you test another parameterization Phillips et al. 2018?

*We have not tested the parameterization of Phillips et al. (2018). However, a recent study by Lachapelle et al. (2025) found that FFD rates derived from Phillips et al. (2018) tend to be low, while those based on Lawson et al. (2015) may be too high. To address this, Lachapelle et al. proposed modified rates for both parameterizations. In our study, we tested the FFD parameterization of Lawson et al. (2015) incorporating the corrections suggested by Lachapelle et al. The SIP rate for FFD follows the original exponent-4 approach (Eq. 3), but is capped when  $D$  exceeds  $1878.2\text{ }\mu\text{m}$ . Additionally, a linear temperature dependence is applied, with an actual rate ( $N_i$ ) rate at  $-12.5^\circ\text{C}$  which will be scaled down ( $c \cdot N_i$ ) to zero at  $-25^\circ\text{C}$  and  $-2^\circ\text{C}$  ( $c$  is a  $T$  dependent linear scaling factor between 0 and 1).*

*In addition to the modified FFD process, we incorporated the ice–ice collisional breakup process (Phillips et al. 2017b) into the simulation. An additional adjustment was made by restricting collisional breakup to cases where the relative velocity between two ice particles exceeds  $1\text{ m s}^{-1}$  (Hoarau et al. 2018, Korolev and Leisner, 2020).*

*The new experiment with three SIP processes is named as “HMgc-FFDI-CB”. FFDI stands for FFD at lower rates (with the correction proposed by Lachapelle et al. 2025), compared to the original version at higher rates. CD stands for collisional breakup.*

*Here is a revised Fig. 5 (new experiment results in green dashed line) for F9:*

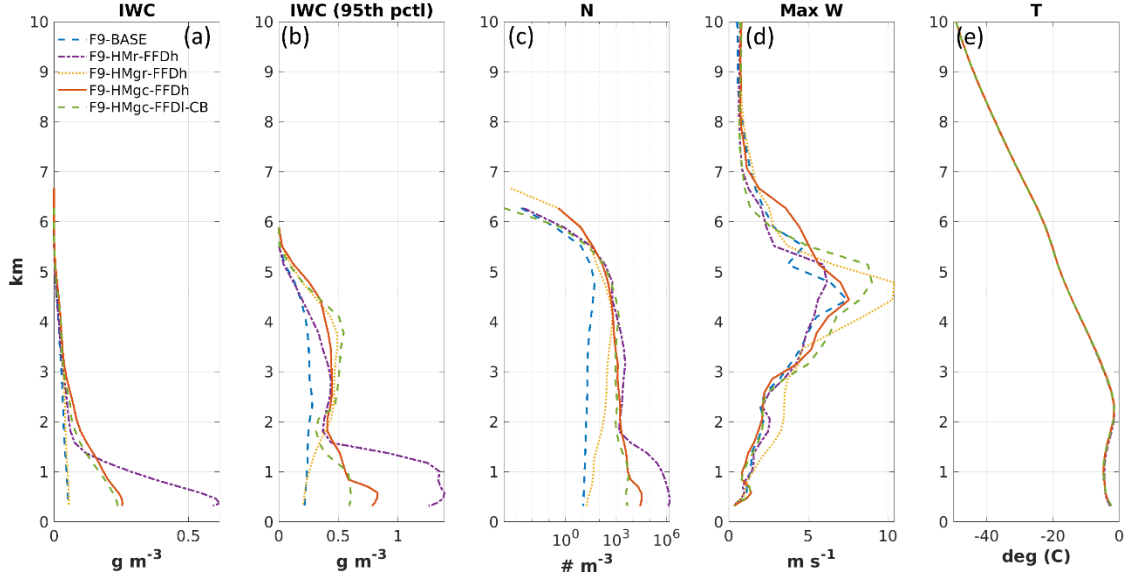

Figure 5. Profiles from the baseline and SIP simulations on 2019-02-07 for the case of ICICLE Flight 9. (a): mean IWC, (b): 95 percentile of IWC (99th pct) of IWC, (c): mean  $N_i$  with the number of ice particle smaller than  $40 \mu\text{m}$  excluded, (d): maximum vertical wind speed ( $w_{\text{max}}$ ), (e)  $T$  (the three simulations have only slightly different temperature that is not distinguishable in the figure). All profiles are calculated from simulation results at 510 min (20:30 UTC) after the initiation time of 12:00 UTC. All profiles are calculated for the region within 10 km of distance to the aircraft track.

The new experiment incorporating all three SIP processes (green dashed lines) yields results similar to the HMgc-FFDh simulation (red lines), which uses the same HM process and a higher FFD rate. We observed that applying the higher FFD rate (original approach, not shown) in combination with both HM and CB processes leads to a significant increase in  $N_i$  near the surface, as both HM and CB processes produce large numbers of ice splinters that further enhance FFD. However, such extremely high values of  $N_i$  were not observed in the actual data. In the new experiment, the use of the reduced FFD rate prevented this explosive increase in  $N_i$  near the surface. This suggests that the FFD rate based on Lawson et al. may be overestimated under this condition, while the reduced rate proposed by Lachapelle et al. (2025) improves the agreement between simulations and observations.

We add this paragraph to the manuscript:

“Including the CB process in the experiment led to an explosive increase in FFD rates near the surface (not shown). To mitigate this, we applied the FFDI (lower rate) parameterization, as proposed by Lachapelle et al. (2025). Results from the three-process experiment (F9-HMgc-FFDI-CB) were similar to those of F9-HMgc-FFDh in terms of  $N_i$ , IWC, LWC, and  $Z_{\text{median}}$ . The CB process (types I, II, and III) produced positive SIP rates at multiple altitudes, including levels below 2 km (Figure 6f, 6g), potentially further activating the FFD process. The use of the FFDI parameterization effectively suppressed near-surface FFD rates, resulting in values that were substantially lower and more realistic.”

Here is a revised Fig. 6 (new experiment results in green dashed line) for Flight 9:



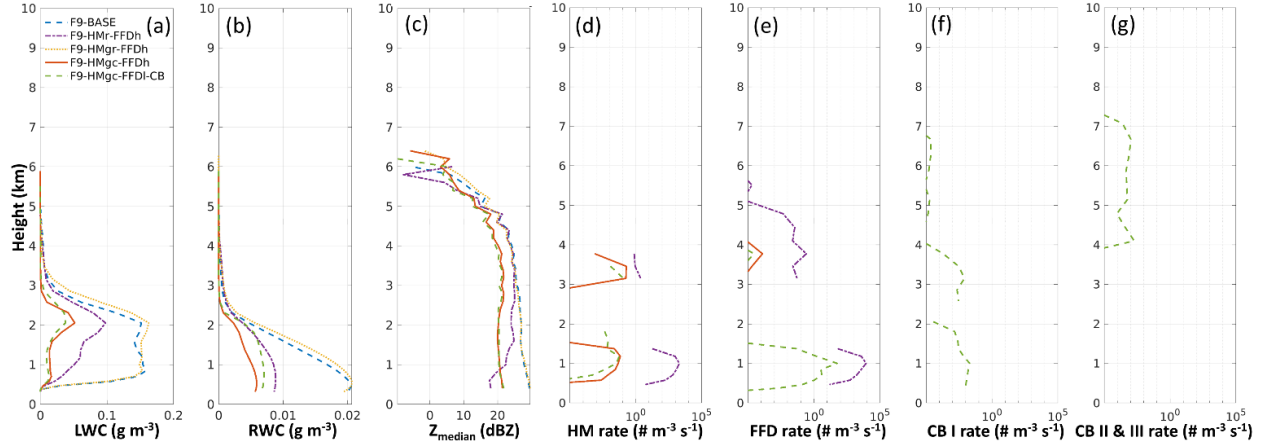

Figure 6. Profiles from the baseline and SIP simulations on 2019-02-07. (a): mean LWC, (b): mean RWC, (c): median radar reflectivity ( $Z_{\text{median}}$ ), (d): mean Hallett-Mossop rate, (e): mean Fragmentation of Freezing Drop rate, (f): ice-ice collisional breakup rate (type I), (g): ice-ice collisional breakup rate (type II & III). All profiles are calculated for the region within 10 km of distance to the aircraft track and at 20:30 UTC.

Similar conclusion for Fig. 6. The panels f and g show the SIP rate from ice-ice collisional breakup for type I (involve graupel and hail only), and for type II & III (involve snow/ice crystal with/without graupel and hail).

Here is a revised Fig. 7 (new experiment results in green dashed line) for F9:

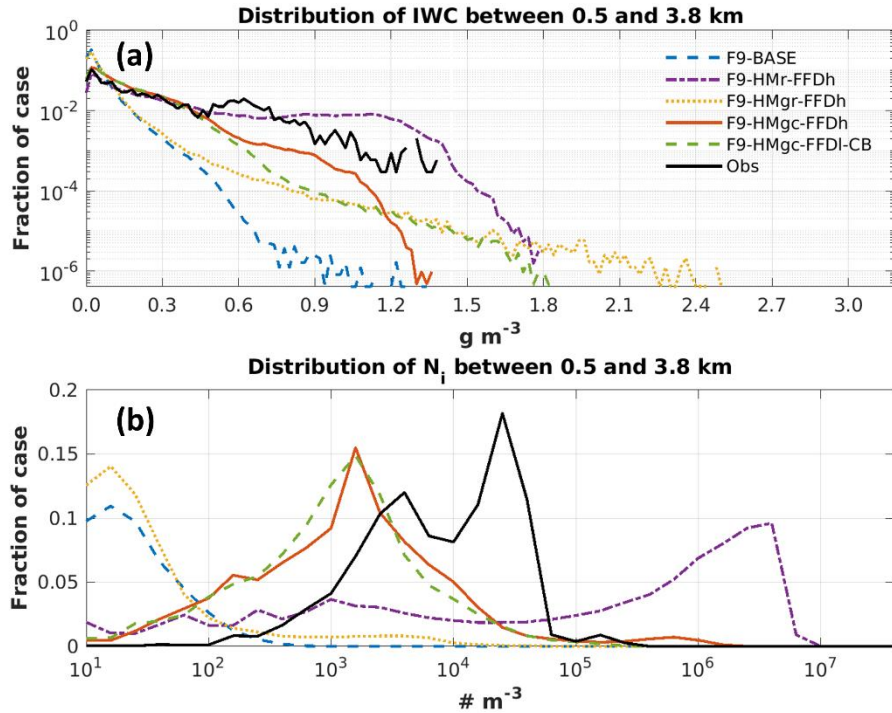

Figure 7. Distribution of IWC (a) and  $N_i$  with the number of ice particle smaller than  $40 \mu\text{m}$  excluded (b) for model simulations at 20:30 UTC on 2019-02-07 and for the observation data for ICICLE Flight 9 between 20:00 and 21:00 UTC. The results from model simulations are calculated for altitudes between 0.5 and 5.5 km and with ice water content higher than  $0.001 \text{ g m}^{-3}$  in the region within 20 km of distance to the aircraft track. The results from in situ observation are calculated for the condition with IWC higher than  $0.001 \text{ g m}^{-3}$ . (b): logarithmic bin width of 1/5 of

an order of magnitude is used. Blue dashed lines: Baseline simulation, purple dash-dot line: SIP (F9-HMr-FFDh), yellow dotted lines: SIP (F9-HMGr-FFDh) simulation, red lines: SIP (F9-HMgc-FFDh) simulation, green dashed lines: SIP (F9-HMgc-FFDI-CB), black lines: observation.

The new experiment (green dashed lines) produces similar  $N_i$  distribution with the cases of extreme high  $N_i$  ( $>2 \times 10^5 \text{ m}^{-3}$ ) reduced even compared to HMgc-FFDh (red line).

The HMgc-FFDI-CB simulation results have been included in most of the figures including for Flight 20, though they are not shown in this response document. For further details and discussion, please refer to the revised manuscript.

#### Reference:

Hoarau, T., Pinty, J.-P., and Barthe, 455 C.: A representation of the collisional ice break-up process in the two-moment microphysics LIMA v1.0 scheme of Meso-NH, *Geoscientific Model Development*, 11, 4269–4289, <https://doi.org/10.5194/gmd-11-4269-2018>, 2018.

Korolev, A. and Leisner, T.: Review of experimental studies of secondary ice production, *Atmospheric Chemistry and Physics*, 20, 11 767–11 797, <https://doi.org/10.5194/acp-20-11767-2020>, 2020.

Lachapelle, M., Nichman, L., Girouard, M., Nguyen, C., Ranjbar, K., Bliankinshtein, N., Bala, K., Thériault, J.M., French, J. R., Minder, J. R., Wolde, M.: Airborne and ground measurements for vertical profiling of secondary ice production during ice pellet precipitation *J Atmos Sci*, 10.1175/jas-d-24-0117.1, 2025.

Phillips, V. T. J., Yano, J.-I., and Khain, A.: 1. Ice Multiplication by Breakup in Ice–Ice Collisions. Part I: Theoretical Formulation, *J. Atmos. Sci.*, 74, 1705–1719, <https://doi.org/10.1175/JAS-D-16-0224.1>, 2017b.

Line 186: model experiments “one with only HMr (based on ice collected rain drops, excluding collected rain used for FFD), one with only FFD”. These two experiments have never been discussed later and listed in Table 1.

*Sorry about the confusion. The two simulations mentioned here were not shown in the initial submitted version. We only intend to show four simulations. We change the description to:*

*“Four additional simulations were carried out: three including both the HM and FFD, and one including HM, FFD and CB. In the three two-process experiments, the same FFDh (higher rate) parameterization is used, coupled with three different HM parameterizations as described in Section 3.3.1. In the final experiment, all three SIP processes were enabled, with the FFDI (lower rate) parameterization applied.”*

Line 211: “ice number concentration ( $N_i$ )”. Can you give the size range of ice?

*The ice particles with size smaller than 40 microns were excluded in the  $N_i$  shown in Fig. 3. For better comparisons, we also excluded ice particles smaller than 40  $\mu\text{m}$  in all the model simulated  $N_i$  values using their size distributions. The text here was revised as:*

*“ice number concentration ( $N_i$ , excluding the particle diameter smaller than 40  $\mu\text{m}$ )”*



Figure 3: The unit of  $N_i$  seems not correct. Same for  $N_i$  in Figure 12.

*The  $N_i$  values presented in Fig. 3 appear consistent with the statistical results shown in Fig. 7, with most cases displaying values between  $1 \times 10^{-3}$  and  $1 \times 10^5 \text{ m}^{-3}$ . Similarly, the results for F20 are also consistent, showing comparable value ranges between those depicted in Fig. 12 and Fig. 16 (which are similar to those observed for F9).*

Line 259-261. “These results indicate that under freezing conditions with an abundant supply of supercooled rain, the initiation of the FFD process is highly dependent on the rate of the HM process, or potentially any SIP processes which could provide sufficient amount of small ice particles.” It is interesting to see the interactions between SIPs. How about SIP and primary ice nucleation interactions?

*Thank you for this excellent question! We added an additional discussion on this in the manuscript:*

*“In the simulations for Flight 9, condensation freezing/deposition ice nucleation likely initiated ice particle formation at altitudes above 4.5 km ( $T < -15^\circ\text{C}$ , as implemented in P3 scheme). As these ice crystals descend, they tend to aggregate, leading to decreased  $N_i$  values (typically less than  $10^2 \text{ m}^{-3}$ ) (see Figure 7b, blue dashed line from the F9-BASE simulation). In addition, the immersion/contact freezing process could also introduce low number of  $N_i$  at higher  $T$  ( $T < -4^\circ\text{C}$ ). Ice particles produced via heterogeneous nucleation can subsequently trigger the HM or CB processes. However, since  $N_i$  generated by heterogeneous nucleation remains low at lower altitudes, where supercooled liquid drops are abundant, the likelihood of activating significant FFD rates is limited. In contrast, the HM and CB processes can produce  $N_i$  values at least an order of magnitude higher than those from heterogeneous nucleation alone, substantially increasing the potential for interactions between ice splinters and supercooled raindrops.”*

Line 266: “based at simulation 510 min simulation time”? The sentence is not correct (two simulations).

*There are 4 simulations using different parameterizations of SIP, but the results shown in Fig. 5 are all from the same time step at 510 min after the model initiation at 2019-02-07 12:00 UTC. We noticed a typo in the figure caption which might be confusion. We revised it as:*

*“Figure 5. Profiles from the baseline and SIP simulations on 2019-02-07 for the case of ICICLE Flight 9. (a): mean IWC, (b): 95 percentile of IWC (99th pctl of IWC), (c): mean  $N_i$  with the number of ice particle smaller than  $40 \mu\text{m}$  excluded, (d): maximum vertical wind speed ( $w_{\text{max}}$ ), (e)  $T$  (the three simulations have only slightly different temperature that is not distinguishable in the figure). All profiles are calculated from simulation results at 510 min (20:30 UTC) after the initiation time of 12:00 UTC. All profiles are calculated for the region within 10 km of distance to the aircraft track.”*

Line 390: “in this stratiform 390 case  $N_i$  is primarily governed by the homogeneous freezing process, with SIP playing a relatively less important role. Ice particles with high number concentrations, formed through homogeneous freezing above 7 km, fall and eventually increase  $N_i$  values at lower altitudes.” Can you provide evidence? how about heterogeneous ice nucleation?

Thank you for this comment! After further analyzing the data, we changed our claim here, and added discussions below in the manuscript:

*“One possible reason for the fairly accurate  $N_i$  values in the F20-BASE simulation is that in this stratiform case  $N_i$  is likely governed by the heterogeneous nucleation process, with SIP playing a relatively less important role. In the F20-BASE simulation, most  $N_i$  values between  $-15^{\circ}\text{C}$  and  $-25^{\circ}\text{C}$  ( $T$  of the maximal flight altitude for Flight 20 at  $\sim 6.4$  km) are higher than the parameterized  $N_i$  due to condensation freezing/deposition ice nucleation (lower half of the small red cycles in Figure 18a) within the same temperature range, but lower than the parameterized  $N_i$  for colder temperatures (upper half of the small red cycles in Figure 18a). Ice particles formed at temperatures below  $-25^{\circ}\text{C}$  through heterogenous nucleation may gradually fall to warmer, lower-altitude regions, thereby contributing to higher  $N_i$  compared to the parameterized  $N_i$ . Additionally, simulated results from F20-BASE (Figure 18a) show a gradual decrease in  $N_i$  with increasing temperature, underscoring the effect of ice particle aggregation.*

*In the case of Flight 20, the cloud top extends above the homogeneous freezing threshold at  $-40^{\circ}\text{C}$ , allowing for the possibility that homogeneous ice nucleation could also influence  $N_i$  at lower altitudes as these ice particles descend. However, as shown in Figures 18a, the  $N_i$  values above the  $-40^{\circ}\text{C}$  level are not substantially higher than most  $N_i$  values seen between  $-20^{\circ}\text{C}$  and  $-30^{\circ}\text{C}$  (ranging from  $10^3$  to  $10^5 \text{ m}^{-3}$ ). As ice particles formed through homogeneous freezing descend into warmer temperatures, aggregation processes are expected to further decrease  $N_i$ , resulting in concentrations lower than those shown between  $-20^{\circ}\text{C}$  and  $-30^{\circ}\text{C}$  in Figure 18a, where most values range from  $10^3$  to  $10^5 \text{ m}^{-3}$ . This pattern indicates that, at temperatures warmer than  $-25^{\circ}\text{C}$ , the ice particle concentrations are more likely dominated by heterogeneous nucleation rather than by the effects of homogeneous nucleation.*

*Compared to F20-BASE (Figure 18a), F20-HMgc-FFDh (Figure 18b) and F20-HMgc-FFDI-CB (Figure 18c) have more frequent occurrences of higher  $N_i$  values for temperatures above  $-10^{\circ}\text{C}$ , indicating the influence of SIP. However, these impacts remain moderate.*

*In the observed  $N_i$  frequency distribution (Figure 18d), two distinct clusters are apparent. One cluster (indicated by the large red circle) aligns closely with the parameterized  $N_i$  line, suggesting the influence of heterogeneous ice nucleation. The second cluster, which exhibits higher  $N_i$  values below  $-20^{\circ}\text{C}$ , may indicate the presence of falling ice particles originating from higher altitudes, regions that were not directly observed due to the flight's altitude limitations. The higher  $N_i$  values may also result from the effects of SIP. However,  $N_i$  gradually decreases with increasing temperature. Unlike the F20-HMgc-FFDh (Figure 18b) and F20-HMgc-FFDI-CB (Figure 18c) cases, there is no distinct ‘protruding’ cluster (green circles in Figure 18b, 18c) that would indicate a sudden  $N_i$  increase at lower altitudes due to SIP. Thus, ice formation in warmer regions (lower altitudes) in Figure 18c is likely dominated by heterogeneous nucleation, although the influence of SIP cannot be ruled out.*

*Observed  $N_i$  values at  $T > -20^{\circ}\text{C}$  (Figure 18c,  $N_i > 1 \times 10^4 \text{ m}^{-3}$ ) are frequently higher than those in the simulations (Figures 18a, 18b and 18c, where  $N_i$  mostly ranges between  $1 \times 10^3$  and  $1 \times 10^4 \text{ m}^{-3}$ ). This discrepancy warrants further investigation into the uncertainties associated*

*with the parameterized heterogeneous nucleation at colder temperatures ( $T < -20^{\circ}\text{C}$ ), the ice-ice collection efficiency and SIP.”*

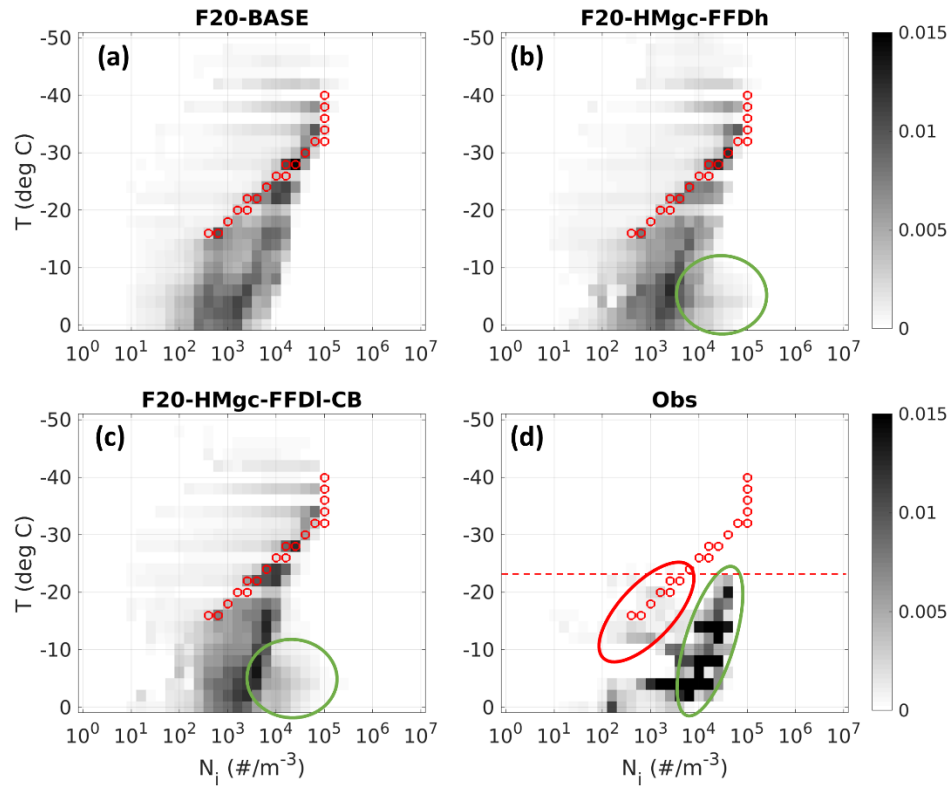

Figure 18: 2D histograms for the frequency of  $N_i$  regarding the  $T$  for F20-BASE (panel a), F20-HMgc-FFDh (panel b), F20-HMgc-FFDI-CB (panel c), and the observation for Flight 20 (panel d). Small red cycles: parameterized  $N_i$  due to condensation freezing/deposition ice nucleation (adapted from Cooper, 1986). Red dashed line: minimal flight  $T$  between 12:30 and 16:00 UTC.

Line 450: “However, even with SIP, the PSD is not yet perfectly captured. Further studies are needed to enhance the accuracy of ice particle size distribution representation.” Can you give some explanations?

*Thank you for your question! In addition to the analyses already conducted, we also examined the size distribution for the HMgc-FFDI-CB simulations. We found similar results to those obtained from the HMgc-FFDh-CB simulations, as shown in the updated Fig. 22:*

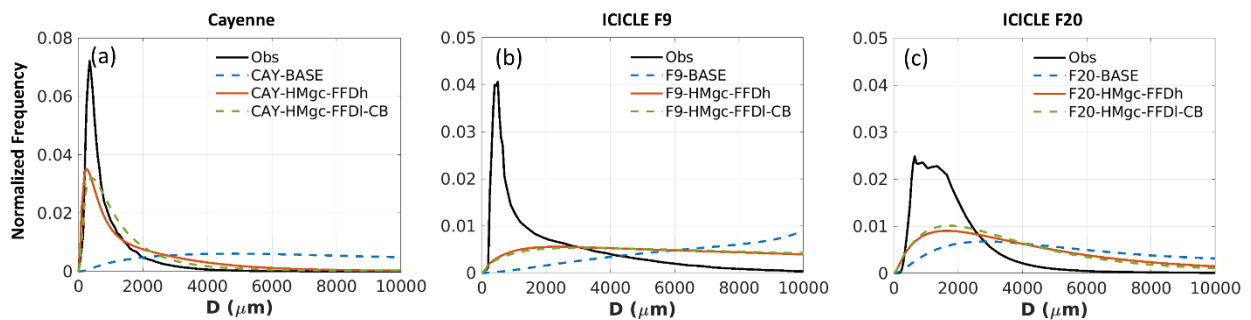

Figure 22. Ice particle mass distribution for HAIC-HIWC 2015 campaign near French Guiana (a), ICICLE Flight 9 (b), Flight 20 (c) for the temperature between  $-15^{\circ}\text{C}$  and  $-5^{\circ}\text{C}$ . Blue dashed lines: baseline simulation (BASE). Red lines: SIP (HMgc-FFDh) simulation. Green dashed lines: SIP (HMgc-FFDI-CB). Black lines: observation.

We have several hypotheses for the underestimation of the fraction of smaller ice particles, particular for those smaller than  $2000\text{ }\mu\text{m}$ . We added the description below in the manuscript to provide a more detailed explanation:

“In the Cayenne case (tropical setting), the storm system exhibits much stronger convection, with more intense turbulence and updrafts, which in turn enhances SIP processes. For instance, vigorous updrafts and abundant supercooled liquid water near the melting layer increase the mixing of liquid droplets and ice particles, thereby boosting both HM and FFD rates. Turbulence further amplifies the efficiency of CB. Overall, the  $N_i$  in the tropical case (Cayenne) is higher than in the mid-latitude winter cases (ICICLE F9 and F20), resulting in a size distribution that is more heavily weighted toward smaller particles for Cayenne.

Strong updrafts in tropical mesoscale systems limit the growth time of ice particles, as many are rapidly transported to higher altitudes. While these vigorous updrafts can promote the formation of rimed particles such as graupel and hail, such particles are generally confined to localized regions within the storm, and the majority of ice in tropical systems consists of smaller ice particles. In contrast, ice particles in mid-latitude winter nimbostratus clouds tend to have longer residence times, allowing for more favorable conditions for depositional growth and aggregation. As a result, aggregation processes are more dominant in mid-latitude winter storms, leading to a greater abundance of larger snow aggregates.

Note that although the fraction of smaller ice particles in the Cayenne case is higher than in ICICLE F20, the total IWC in the Cayenne case is actually greater, with some extreme values exceeding  $3\text{ g m}^{-3}$ , levels not observed in ICICLE F20.”

Conclusions and perspectives section: please add some discussions on primary ice nucleation and other SIP processes and role of them for model simulations.

*This is a great suggestion! We added the following paragraphs for the discussion:*

“Heterogeneous ice nucleation plays a key role in regulating ice cloud properties under mid-latitude winter conditions. It not only provides the initial ice particles needed to initiate the HM and CB processes, but in stratiform cloud cases like ICICLE Flight 20, where the impact of SIP processes is moderate, it might have a more direct influence on controlling  $N_i$ . Under these conditions, accurate modeling of the heterogeneous nucleation process is crucial, as current simulation results suggest an underestimation of  $N_i$  for  $T > -20^{\circ}\text{C}$  during ICICLE Flight 20.”
